# Supplementary material for: Gallium(i)–alkaline earth metal donor–acceptor bonds
Source: Royal Society of Chemistry journal article supplement (doi:10.1039/b614165j), 2006-11-24
Supplement: b614165j.pdf [file b614165j.pdf]

## Supplementary Material

**Title:** Gallium(I)-Alkaline Earth Metal Donor-Acceptor bonds.

**Authors:** Michal Wiecko, Peter W. Roesky, Paola Nava, Reinhart Ahlrichs, and Sergey N. Konchenko

**Table 1.** Computed selected structural constants of  $[(\eta^5\text{-C}_5\text{Me}_5)\text{Ga}]$  (**1a**),  $[(\eta^5\text{-C}_5\text{Me}_5)_2\text{Ca}]$  (**1b**), and  $[(\eta^5\text{-C}_5\text{Me}_5)_2\text{Ca-Ga}(\eta^5\text{-C}_5\text{Me}_5)]$  (**1**). Structure optimizations have been performed at MP2 and density functional theory (DFT) level with the functional BP86. The basis set is def2-TZVP (triple zeta valence augmented by polarization functions, e. g. 2d1f for C) and def2-QZVP for Ca. Lengths in Å, angles in degrees, ED = electron diffraction experiment, Cg = centroid of the  $\text{C}_5\text{Me}_5$  ring.

|                                                                                                                                                                                                                                                                                                                                                                                                                                                                                                                                                                                                                                                                   |                                     | <b>BP86</b> | <b>MP2</b> | <b>XRD</b>              | <b>ED</b>               |
|-------------------------------------------------------------------------------------------------------------------------------------------------------------------------------------------------------------------------------------------------------------------------------------------------------------------------------------------------------------------------------------------------------------------------------------------------------------------------------------------------------------------------------------------------------------------------------------------------------------------------------------------------------------------|-------------------------------------|-------------|------------|-------------------------|-------------------------|
| <b>1a</b>                                                                                                                                                                                                                                                                                                                                                                                                                                                                                                                                                                                                                                                         | Cg-Ga                               | 2.096       | 2.025      | 208.1 <sup>(a)</sup>    | 208.1(5) <sup>(b)</sup> |
| <b>1b</b>                                                                                                                                                                                                                                                                                                                                                                                                                                                                                                                                                                                                                                                         | Cg-Ca                               | 2.632       | 2.278      | 233-236 <sup>(c)</sup>  | 2.312(6) <sup>(d)</sup> |
|                                                                                                                                                                                                                                                                                                                                                                                                                                                                                                                                                                                                                                                                   | Cg <sub>1</sub> -Ca-Cg <sub>2</sub> | 180         | 157.6      | 146-148 <sup>(c)</sup>  | 154(3) <sup>(d)</sup>   |
| <b>1</b>                                                                                                                                                                                                                                                                                                                                                                                                                                                                                                                                                                                                                                                          | Ga-Ca                               | 3.423       | 3.068      | 3.183(2) <sup>(e)</sup> |                         |
|                                                                                                                                                                                                                                                                                                                                                                                                                                                                                                                                                                                                                                                                   | Cg <sub>Ga</sub> -Ga                | 2.047       | 1.964      | 1.99(2)                 |                         |
|                                                                                                                                                                                                                                                                                                                                                                                                                                                                                                                                                                                                                                                                   | Cg <sub>1</sub> -Ca                 | 2.367       | 2.307      | 2.347(5)                |                         |
|                                                                                                                                                                                                                                                                                                                                                                                                                                                                                                                                                                                                                                                                   | Cg <sub>1</sub> -Ca-Cg <sub>2</sub> | 148.74      | 149.32     | 147.44(1)               |                         |
| <sup>(a)</sup> D. Loos, E. Baum, A. Ecker, H. Schnöckel, A. J. Downs, <i>Angew. Chem.</i> <b>1997</b> , <i>109</i> , 894-895; <i>Angew. Chem., Int. Ed. Engl.</i> <b>1997</b> , <i>36</i> , 860-862.<br><sup>(b)</sup> A. Haaland, K.-G. Martinsen, H. V. Volden, D. Loos, H. Schnöckel, <i>Acta Chem. Scand.</i> <b>1994</b> , <i>48</i> , 172-174.<br><sup>(c)</sup> R. A. Williams, T. P. Hanusa, and J. C. Huffman, <i>Organometallics</i> <b>1990</b> , <i>9</i> , 1128-1134.<br><sup>(d)</sup> R. A. Andersen, R. Blom, J. M. Boncella, C. J. Burns, H. V. Volden, <i>Acta Chem. Scand. A</i> <b>1987</b> , <i>41</i> , 24-35.<br><sup>(e)</sup> This work. |                                     |             |            |                         |                         |
